# Supplementary material
Source: Elsevier journal article supplement (https://www.sciencedirect.com/science/article/pii/S1665268120301745)
Supplement: mmc1 [file S1665268120301745:mmc1.docx]

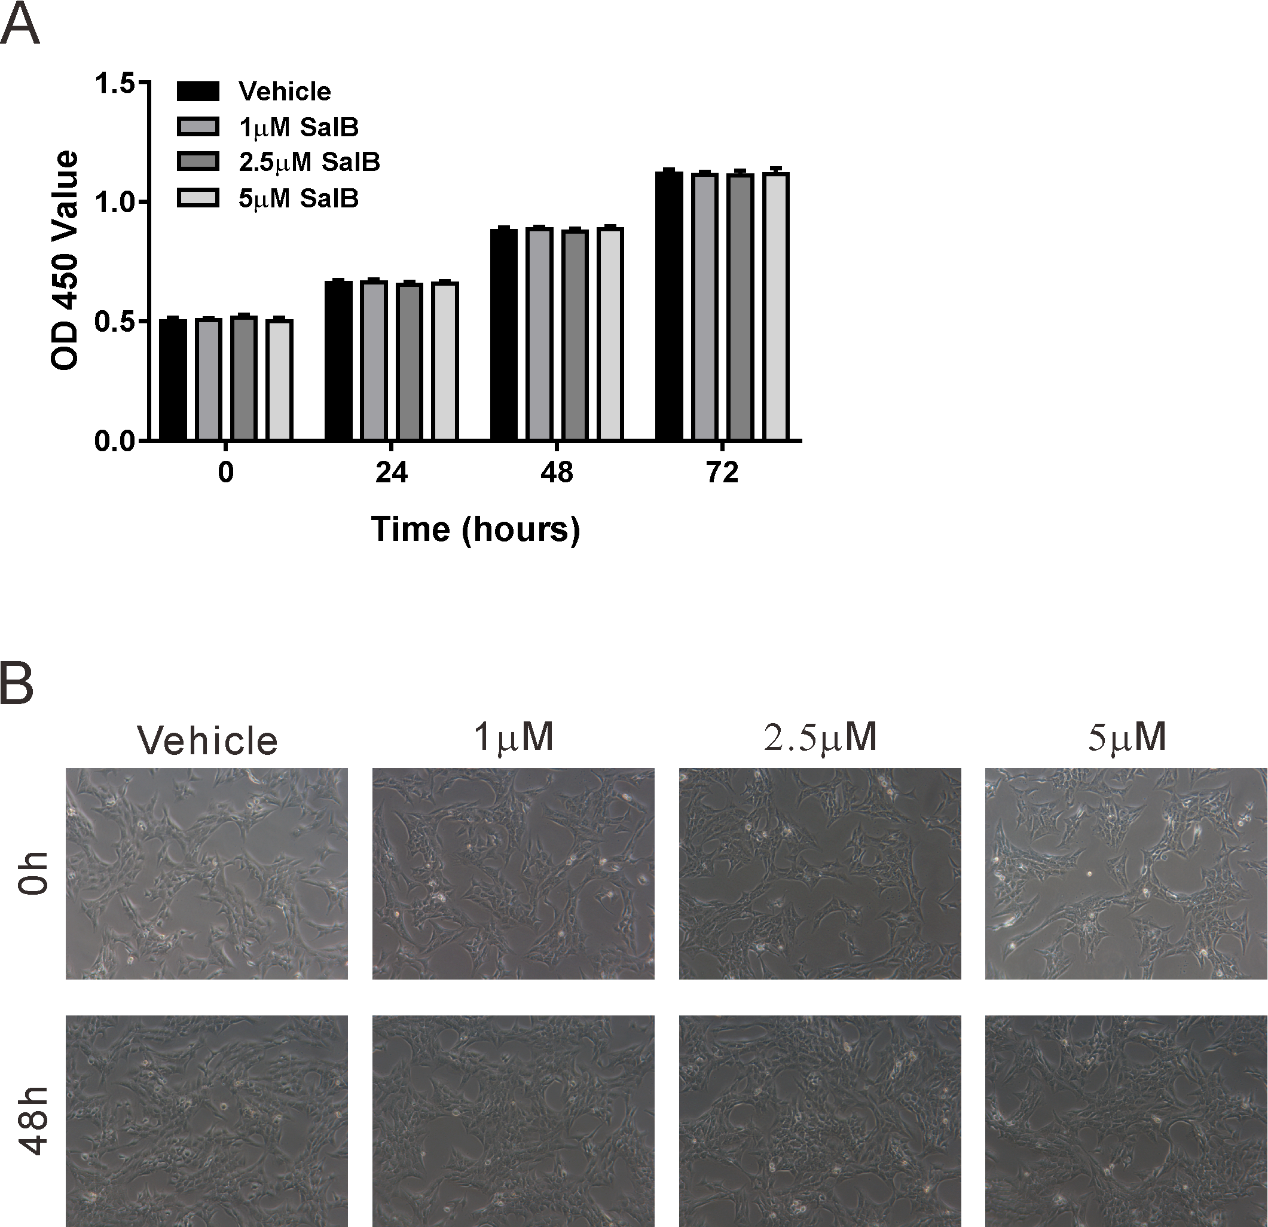


**Fig.S1.** The effects of Salvianolic acid B on LX-2 cell viability. LX-2 cells were treated with different concentrations of salvianolic acid B, as indicated. (A) Cell viability were determined by CCK-8 assay. (B) Cell morphology analysis. Values represent mean ± standard deviation (n = 5).
